# Supplementary material for: MUSI: an integrated system for identifying multiple specificity from very large peptide or nucleic acid data sets
Source: PubMed Central journal article supplement — Nucleic Acids Res. 2011 Dec 31;40(6):e47. doi: 10.1093/nar/gkr1294 (PMC3315295; doi:10.1093/nar/gkr1294), 2011-12-31
Supplement: supp_gkr1294_nar-02036-met-n-2011-File006.pdf [file supp_gkr1294_nar-02036-met-n-2011-File006.pdf]

## Supplementary Figures

**Supplementary Figure 1.** An example of an Illumina Sequencing strategy compatible with MUSI.

**Supplementary Figure 2.** Histogram of AUC differences among MUSI, MEME, and Uniprobe (305 genomic datasets).

**Supplementary Figure 3.** Histogram of AUC on 305 genomic datasets (MUSI = red, MEME = green, and Uniprobe = blue).

**Supplementary Figure 4.** Performance comparison between MUSI and BEEML on 167 transcription factors from Berger et al. (a) Histogram of AUC differences between MUSI and BEEML (b) AUCs for MUSI and BEEML (c) Time comparison between BEEML and MUSI. For BEEML we have used matrices from Uniprobe for optimization. For MUSI, we have used our filtered data set (See *Materials and Methods*)

**Supplementary Figure 5.** Testing MUSI with noisy data. 100, 200, 300, 500, and 1000 random peptides have been added to the set of phage display peptides binding to SRC SH3 domain. MUSI identifies these noisy data in each example and assigns them to an additional unspecific motif (PWM3). The fraction after the comma in the last column indicates the number of random peptides correctly assigned to the flat logo.

**Supplementary Figure 6.** Testing MUSI with longer sequences. Originally, Src SH3 domain binders from phage-display experiments followed by next generation sequencing have a length of 12 amino acids. We have randomly inserted these peptides within random peptides of length 10, 15, 20, 25, 30, 35 and 40. As shown, MUSI can still detect multiple specificity with these random flanking regions, until alignment breaks (around 40-mers).

**Supplementary Table 1.** Cross-validation results (10-fold) for the 305 genomic datasets with different values for parameters P, D and D' used to determine the optimal number of PWMs (see *Materials and Methods*)

## Illumina Sequencing strategy for sequencing the phage encapsulated DNA

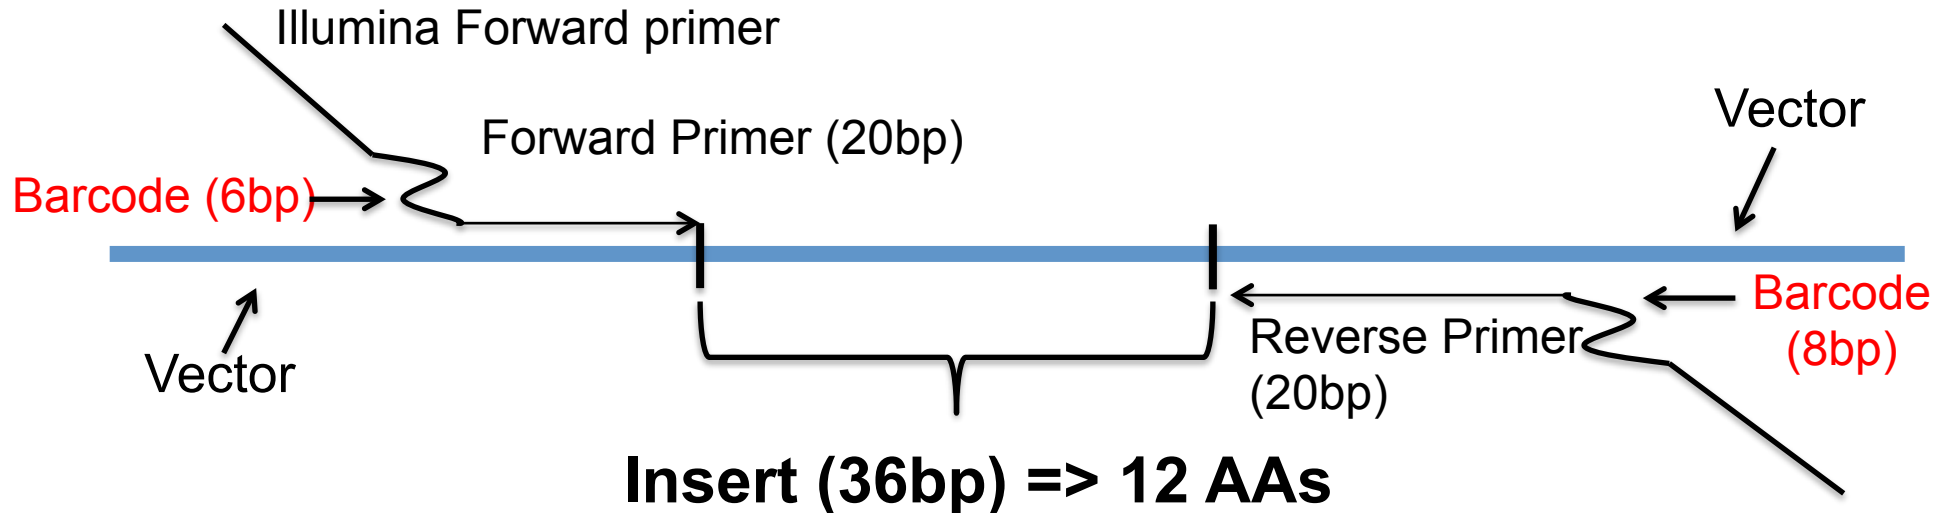

## PCR Amplification

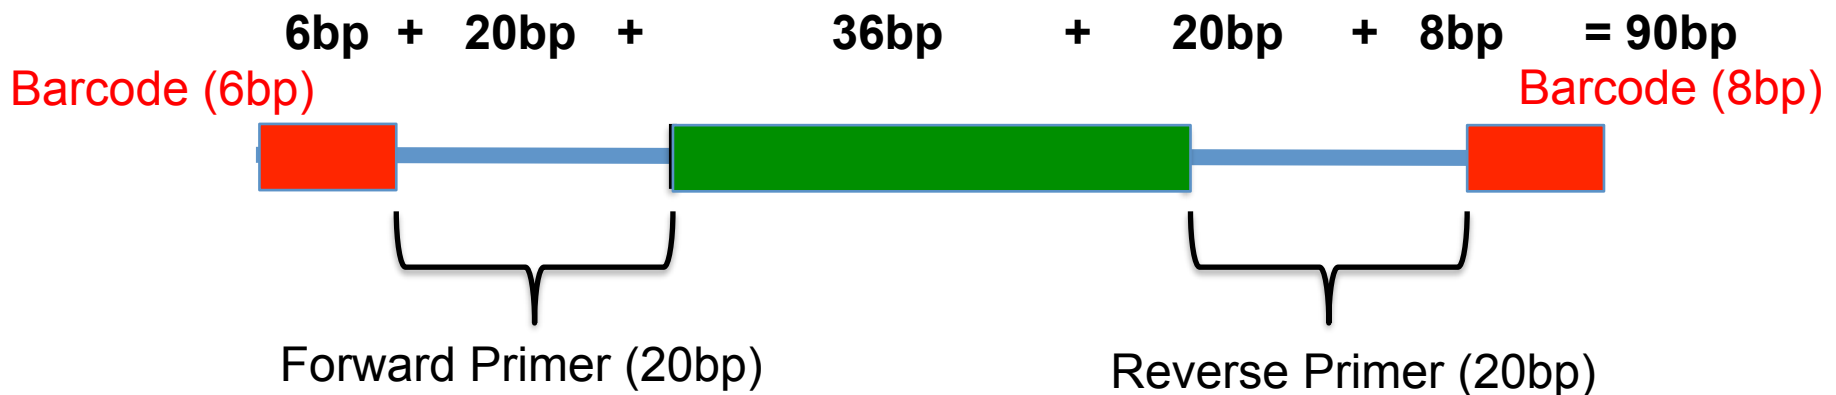

**A****MUSI-MEME**

Mean = 0.0529 STD = 0.0911 p-value = 1.09e-194

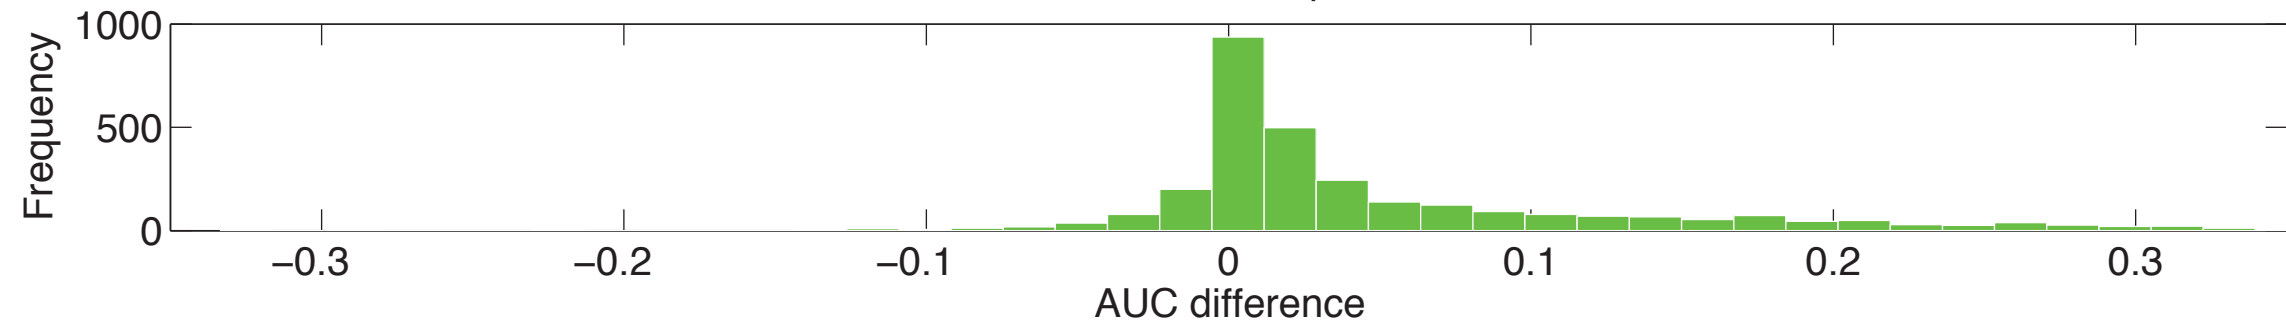**B****MUSI-UNIPROBE**

Mean = 0.0555 STD = 0.0759 p-value = 6.12e-286

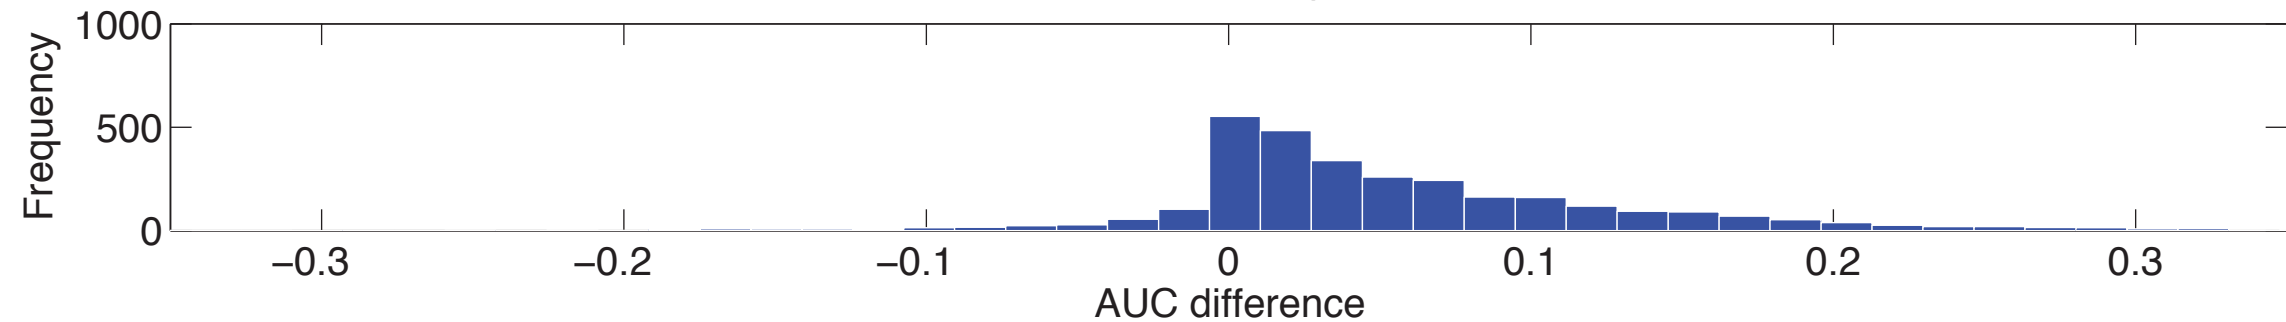**C****MEME-UNIPROBE**

Mean = 0.0026 STD = 0.0899 p-value = 0.1147

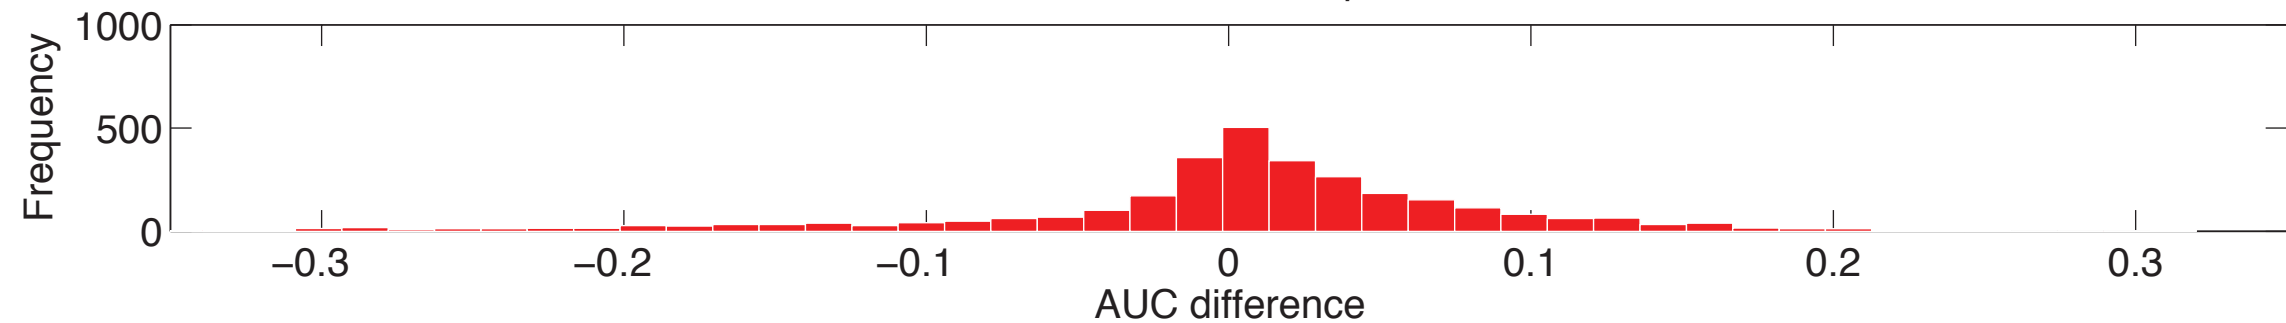

**A****MUSI**

Mean = 0.9721 STD = 0.0445

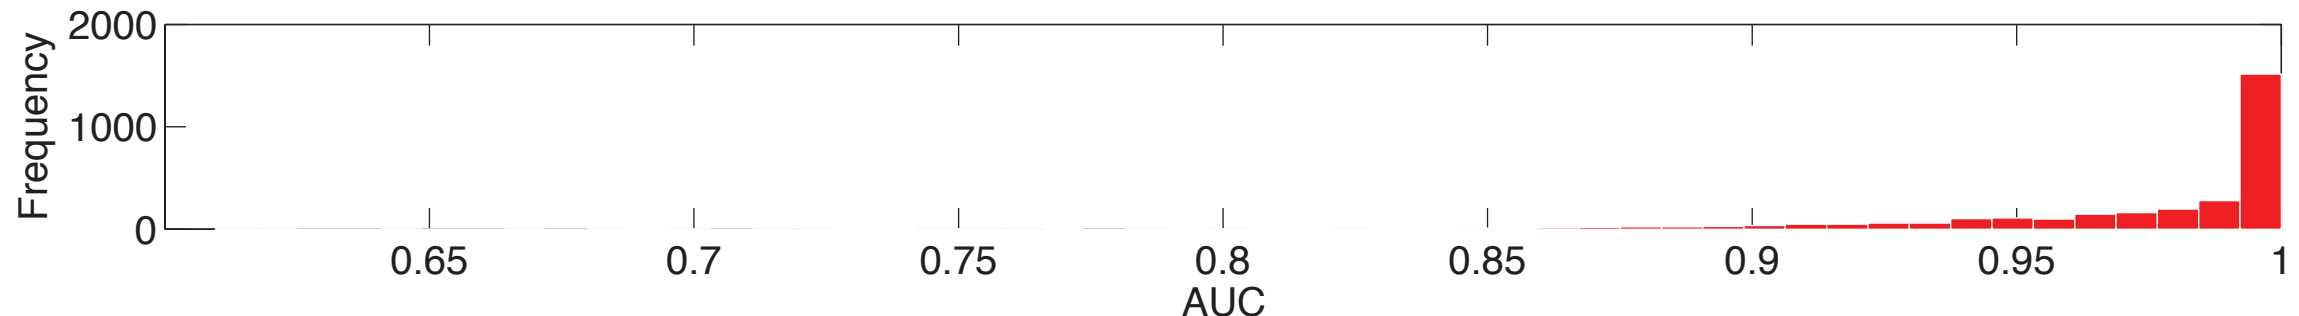**B****MEME**

Mean = 0.9192 STD = 0.1001

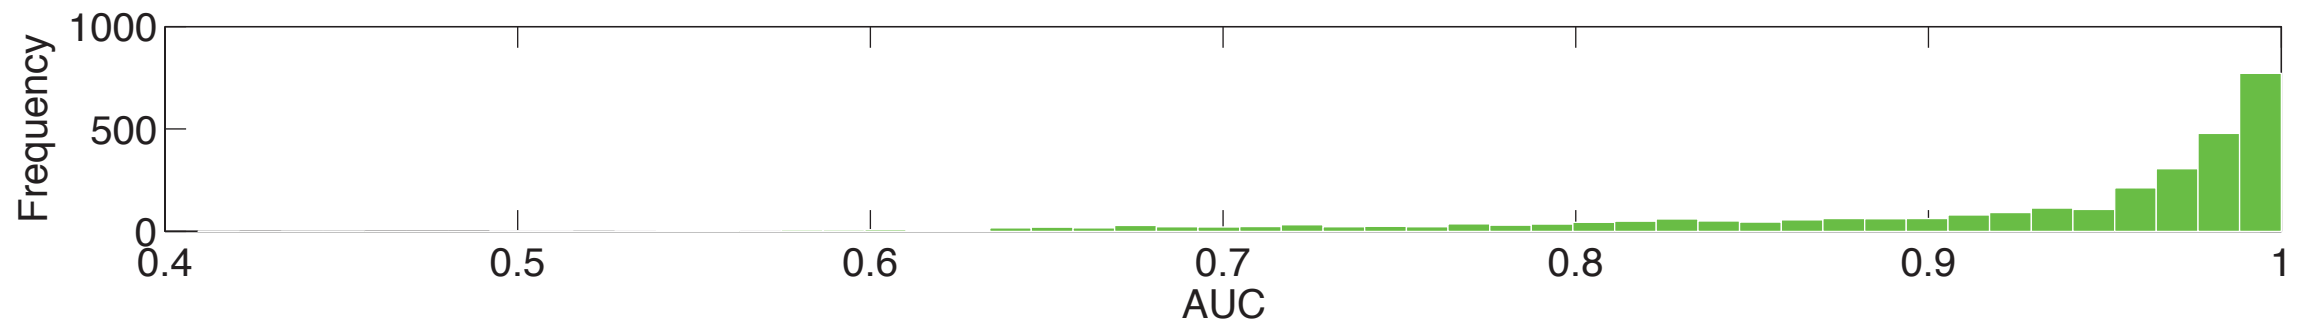**C****UNIPROBE**

Mean = 0.9167 STD = 0.0778

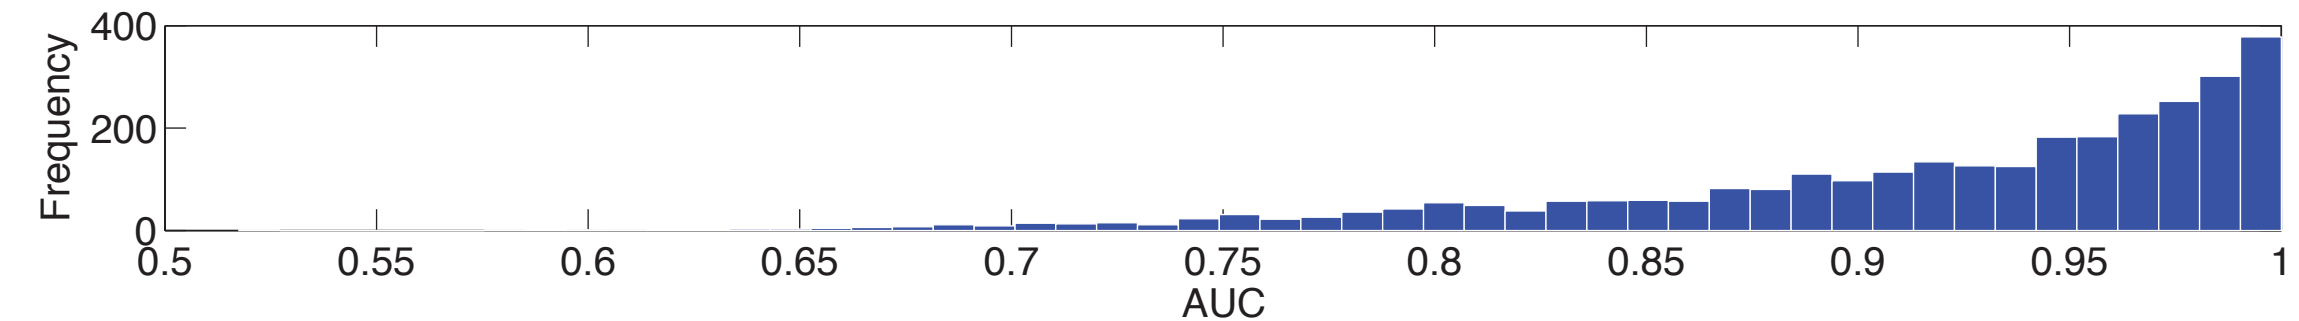

**A****COMPARISON BETWEEN MUSI AND BEEML**  
P-VALUE :  $7.02e-44$  (T-test)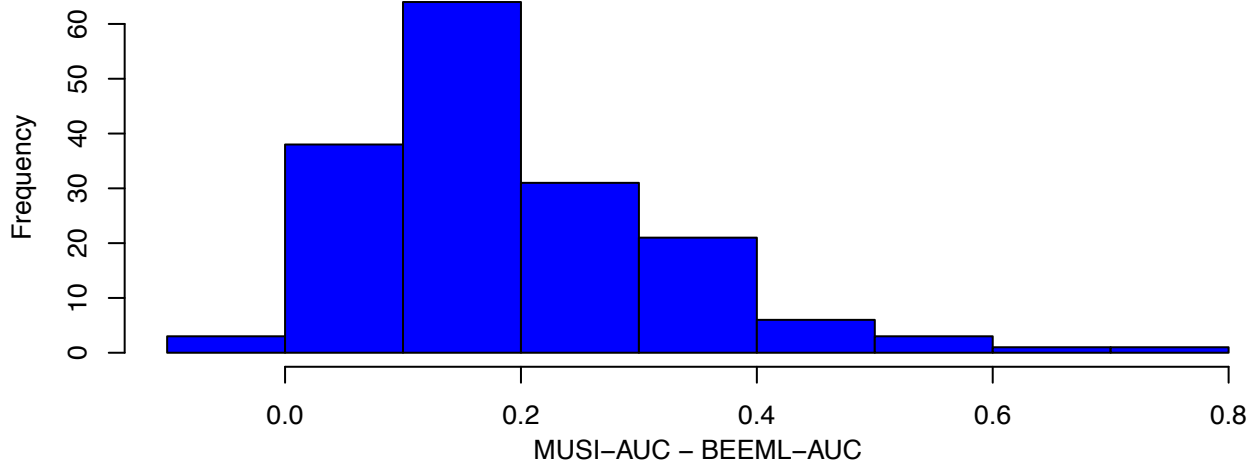**B****AUC COMPARISON OF MUSI AND BEEML**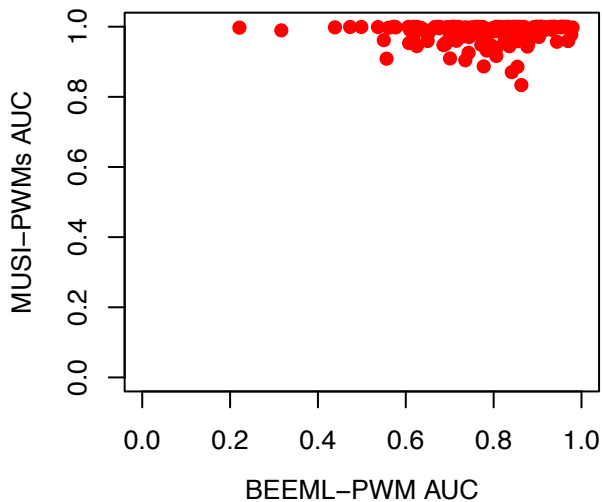**C****TIME COMPARISON OF MUSI AND BEEML**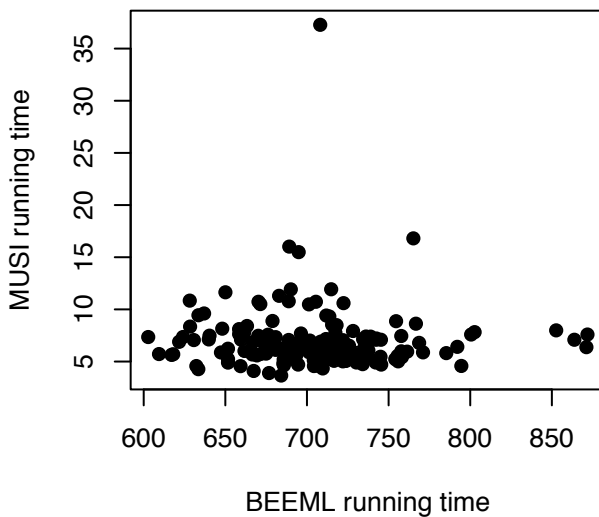

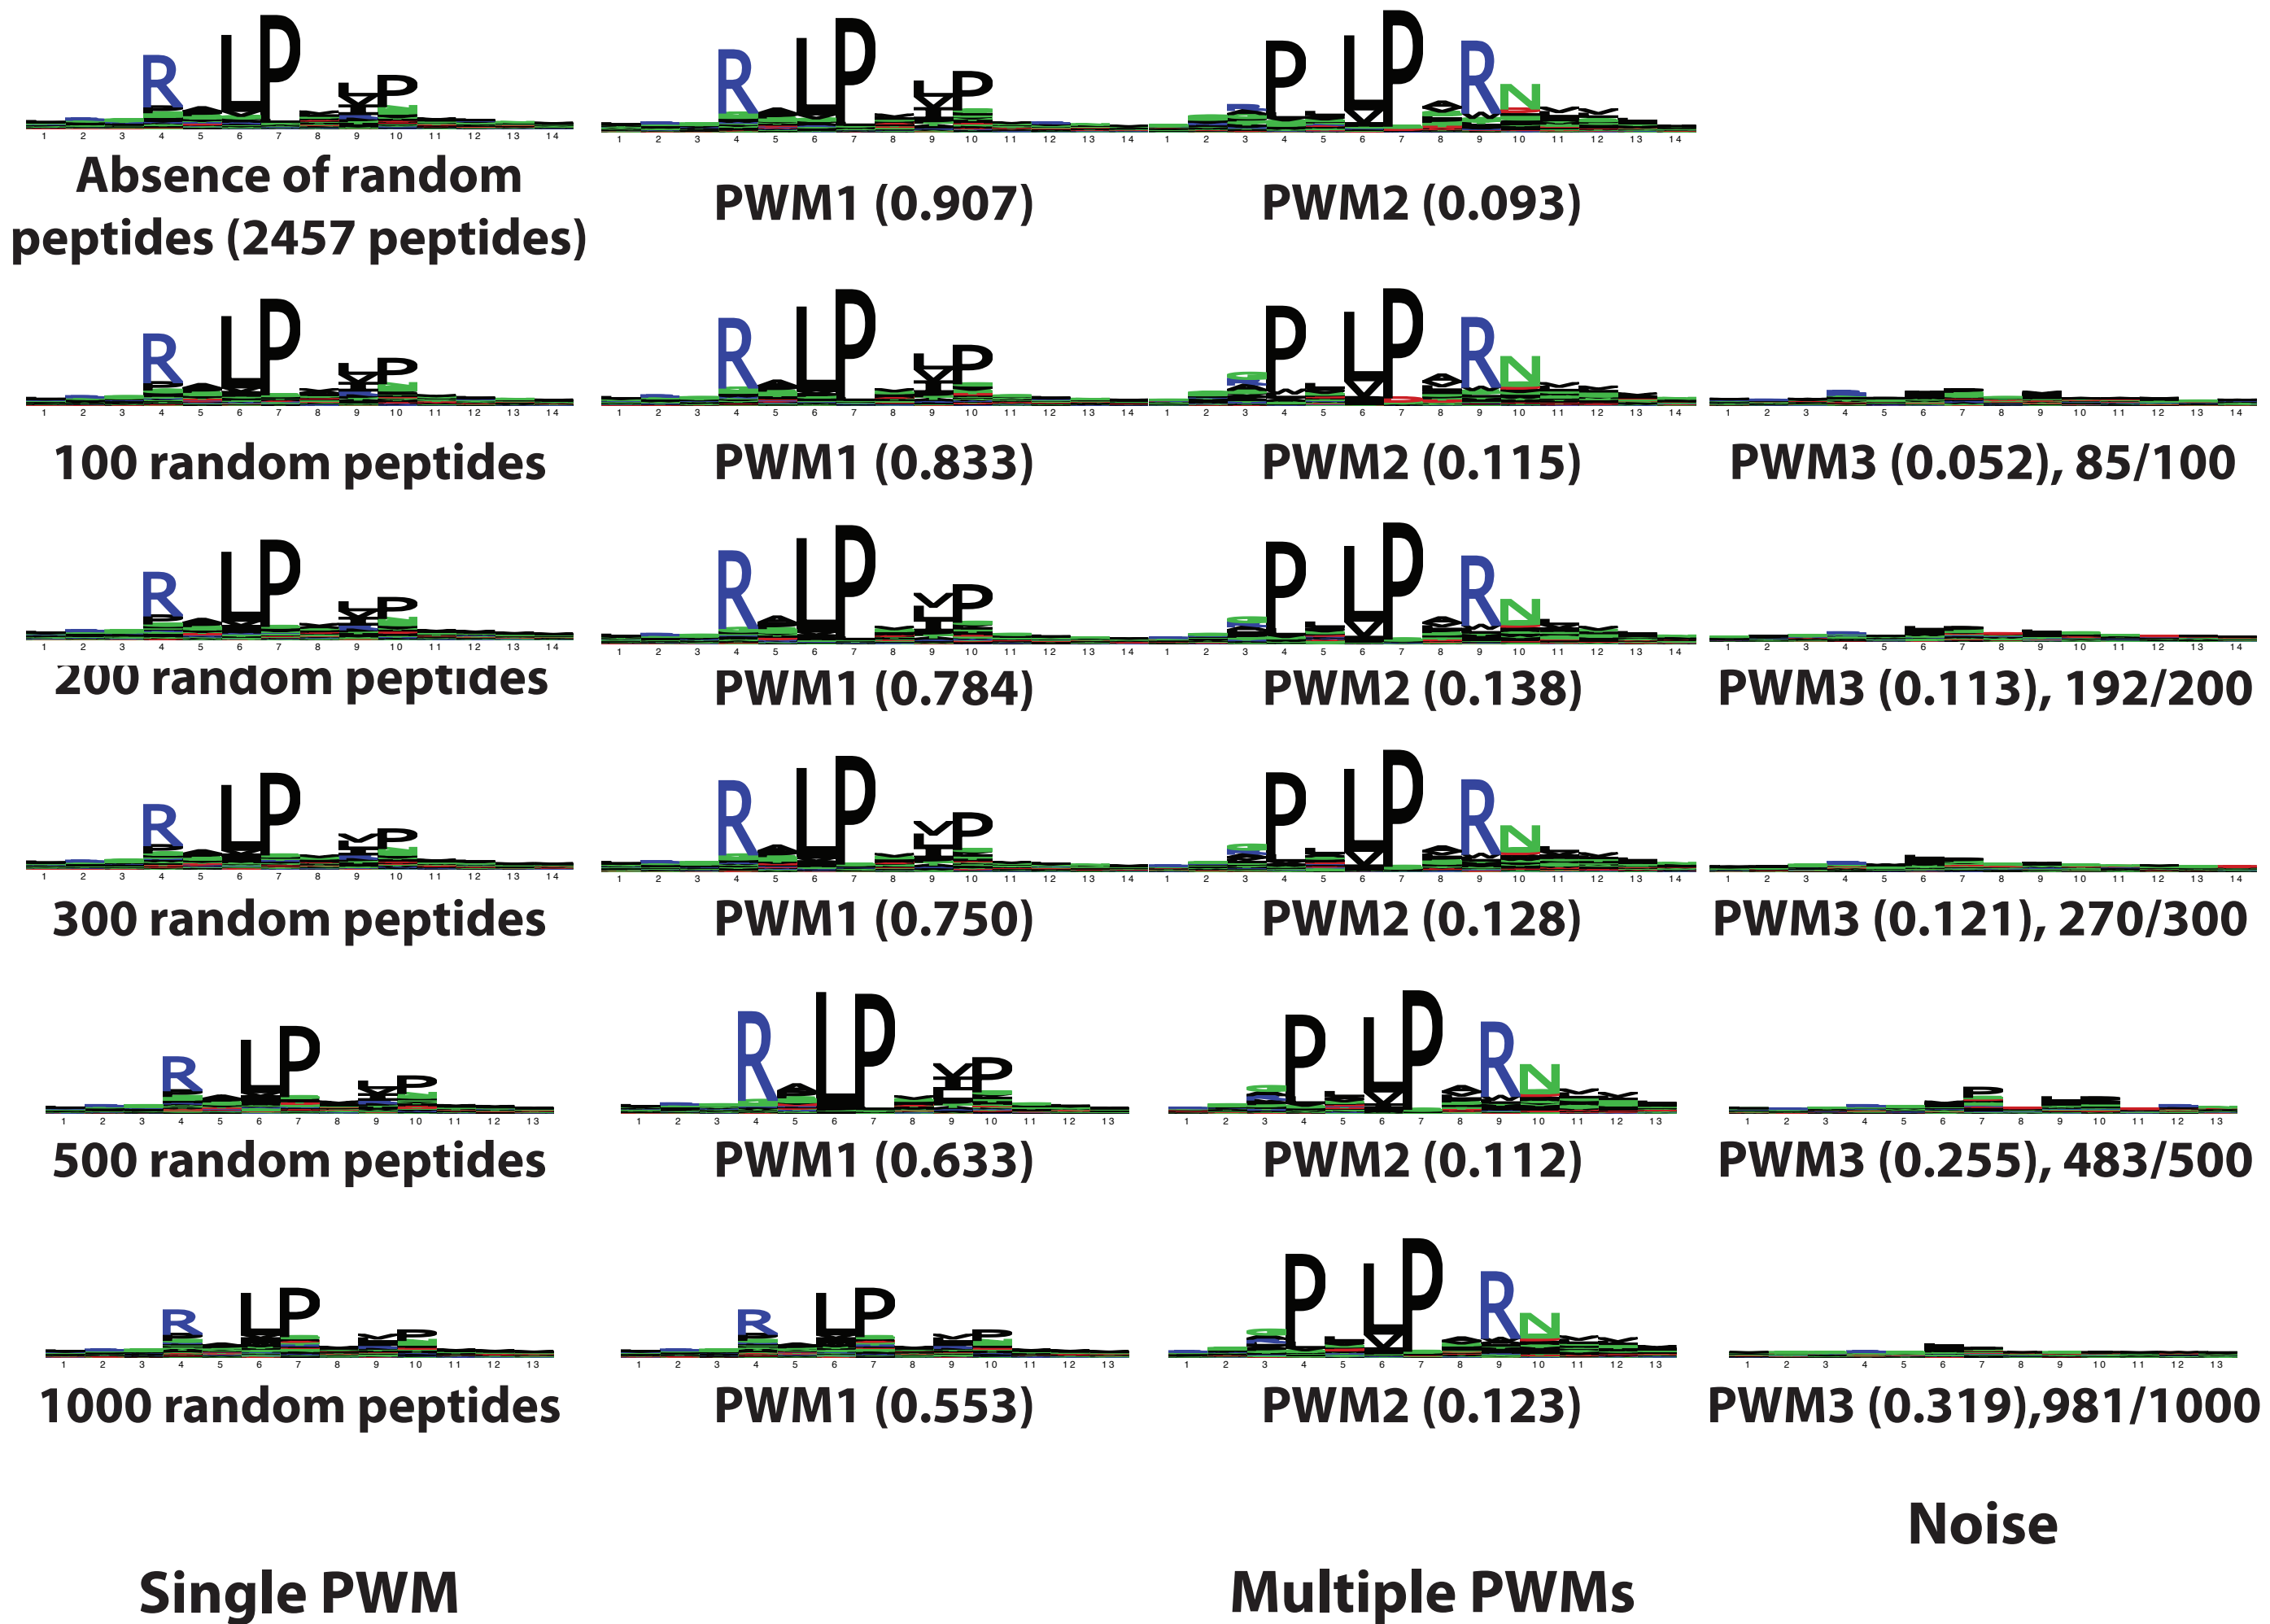

## Single PWM

## Multiple PWMs

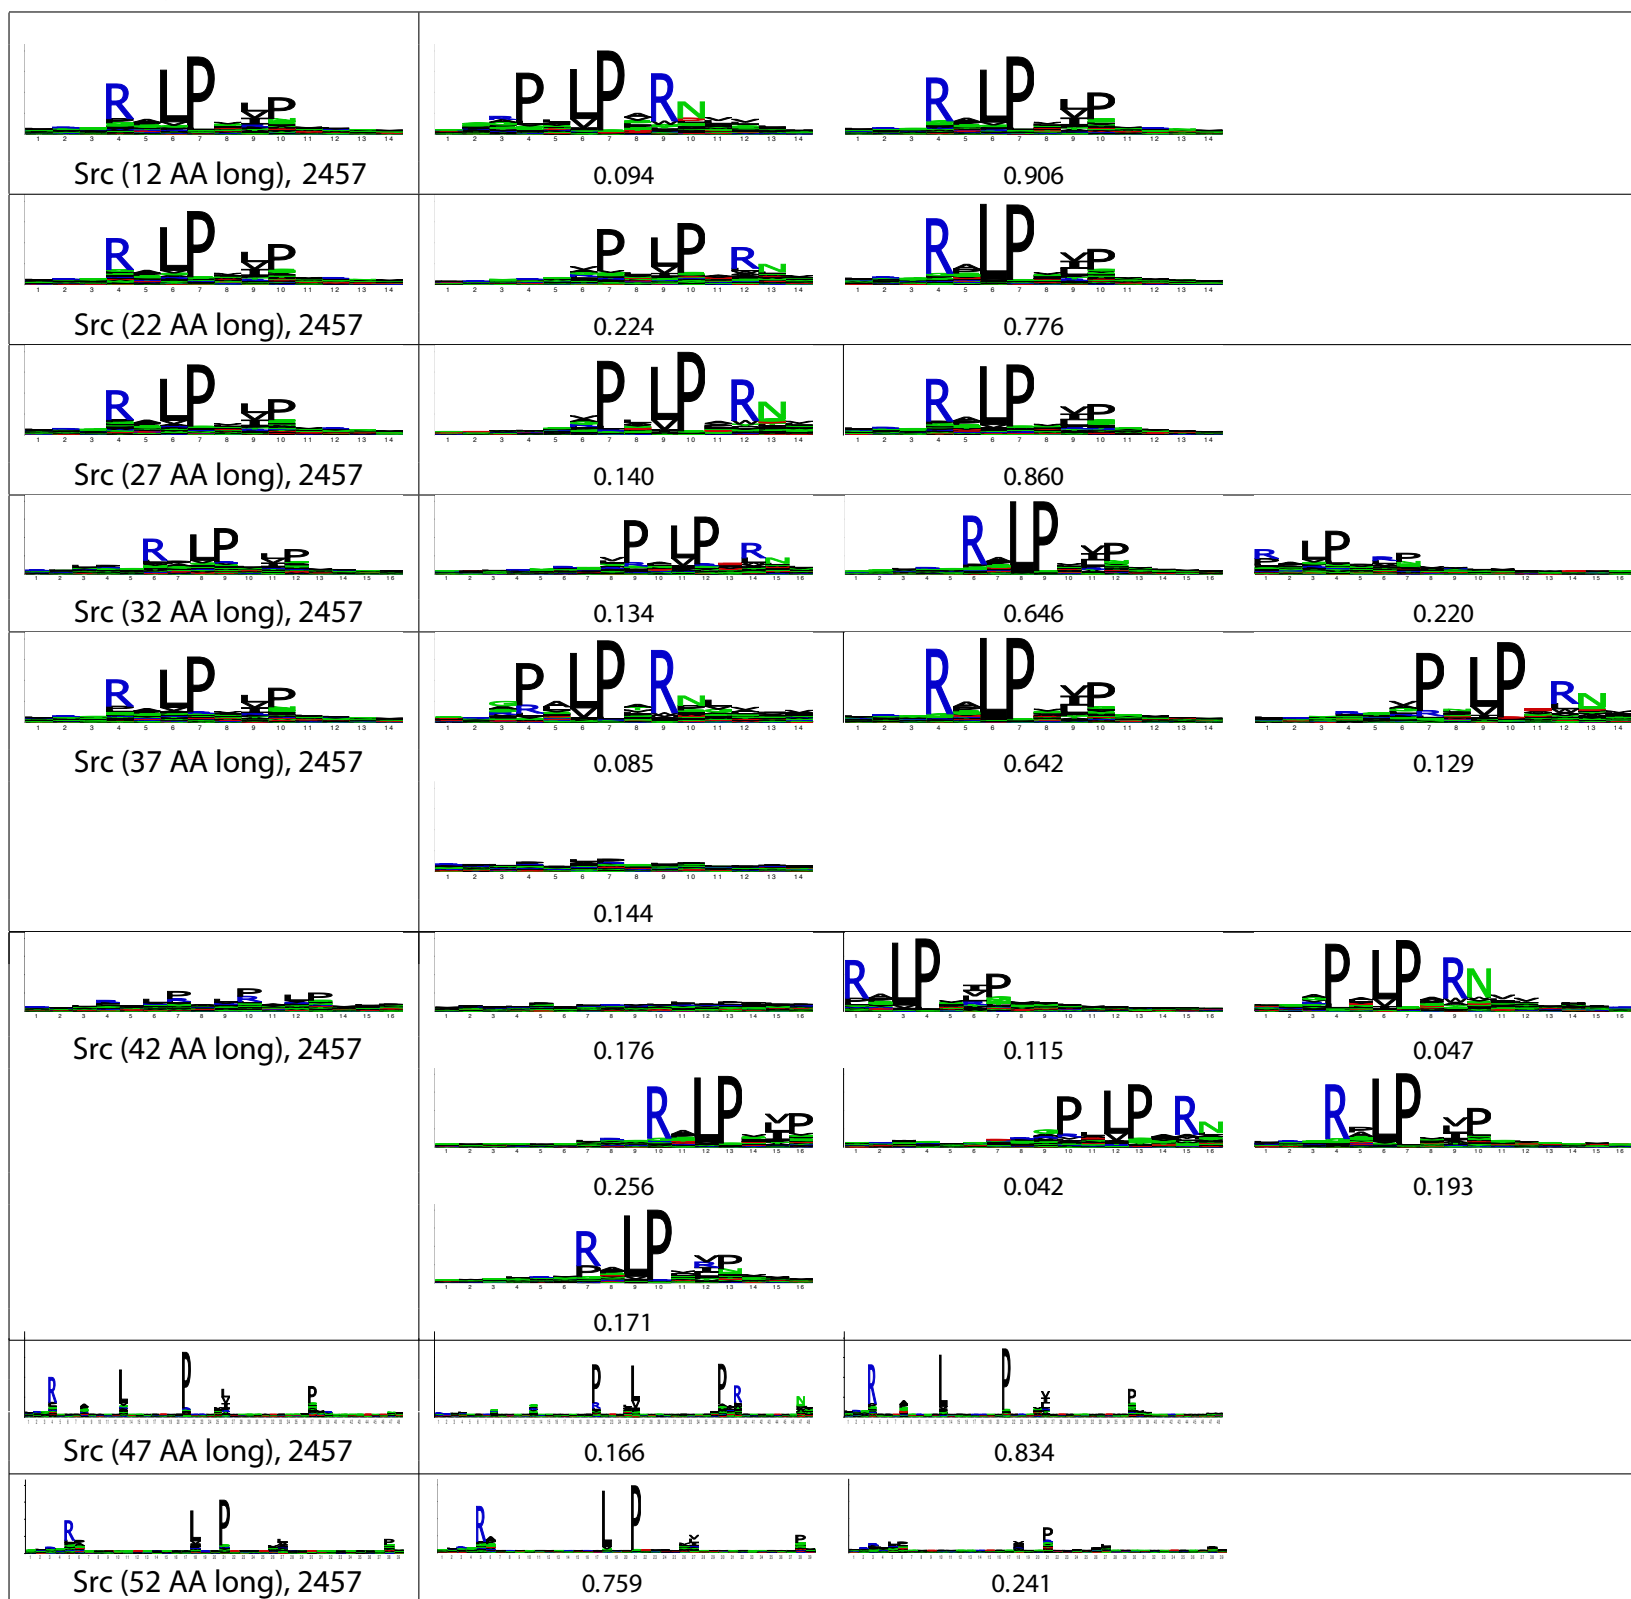

**Supplementary table 1**

| <b>P</b> | <b>D</b> | <b>D'</b> | <b>AUC average</b> | <b>AUC Std</b> |
|----------|----------|-----------|--------------------|----------------|
| 0.01     | 0.45     | 0.6       | 0.974511471        | 0.036966397    |
| 0.01     | 0.45     | 0.63      | 0.973908659        | 0.037237625    |
| 0.01     | 0.45     | 0.66      | 0.973300414        | 0.038864712    |
| 0.01     | 0.5      | 0.6       | 0.974139188        | 0.037530562    |
| 0.01     | 0.5      | 0.63      | 0.973552735        | 0.037785663    |
| 0.01     | 0.5      | 0.66      | 0.972950179        | 0.039377807    |
| 0.01     | 0.55     | 0.6       | 0.972704217        | 0.039603117    |
| 0.01     | 0.55     | 0.63      | 0.972108195        | 0.039879698    |
| 0.01     | 0.55     | 0.66      | 0.971510674        | 0.041543022    |
| 0.02     | 0.45     | 0.6       | 0.974229405        | 0.037409953    |
| 0.02     | 0.45     | 0.63      | 0.97382704         | 0.037236109    |
| 0.02     | 0.45     | 0.66      | 0.973093038        | 0.039081974    |
| 0.02     | 0.5      | 0.6       | 0.974146004        | 0.037455768    |
| 0.02     | 0.5      | 0.63      | 0.97376012         | 0.03727218     |
| 0.02     | 0.5      | 0.66      | 0.973016802        | 0.039119573    |
| 0.02     | 0.55     | 0.6       | 0.97356215         | 0.037734767    |
| 0.02     | 0.55     | 0.63      | 0.973186675        | 0.037564106    |
| 0.02     | 0.55     | 0.66      | 0.972426717        | 0.039554497    |
